1  
2  
3  
4  
5  
6  
7  
8  
9  
10  
11  
12  
13  
14  
15  
16  
17  
18  
19  
20  
21  
22  
23

**Understanding the nature of substance use in Zimbabwe: State of the art and ways forward: A scoping review protocol**

Blessing, N. Marandure<sup>1¶\*</sup>, Samson Mhizha<sup>2&</sup>, Amanda Wilson<sup>1&</sup>, Clement Nhunzvi<sup>3¶</sup>

<sup>1</sup>Institute of Psychological Science, De Montfort University, Leicester, UK

<sup>2</sup>Department of Applied Psychology, University of Zimbabwe, Harare, Zimbabwe

<sup>3</sup>Department of Primary Health Care Sciences, University of Zimbabwe, Harare, Zimbabwe

\* Corresponding author  
E-mail: [nyashab@gmail.com](mailto:nyashab@gmail.com) (BM)

¶BM and CN are joint senior authors.

&These authors contributed equally to this work.

## 24 **Abstract**

25

26 Reports of substance use in Zimbabwe paint a concerning picture of escalating  
27 prevalence of use, with over half of people admitted to inpatient mental health units  
28 reportedly experiencing a substance induced disorder. The country has gone through decades  
29 of significant political and socio-economical challenges, which are undoubtedly linked to the  
30 observed increases in substances use. Nevertheless, despite the resource constraints to  
31 adequately address substance use, the government has shown a renewed resolve to provide a  
32 comprehensive approach to address substance use in the country. However, there is a lack of  
33 clarity of the nature and extent of substance use and substance use disorders (SUDs), which  
34 in part is due to a lack of a national monitoring system for substance use in the country.  
35 Moreover, reports of a substance use crisis in Zimbabwe are predominantly based on  
36 anecdotal evidence, limiting the ability to gain an accurate picture of the situation. Therefore,  
37 a scoping review of the primary empirical evidence of substance use and SUDs is proposed in  
38 order to develop an adequately informed understanding of the nature of substance use and  
39 SUDs in Zimbabwe. Furthermore, the review will embed an assessment of the response to  
40 substance use, together with an analysis of the policy landscape on substance use in  
41 Zimbabwe. The PRISMA-ScR checklist will be utilised for the write up. The results of the  
42 scoping review will be essential for identifying the current state of knowledge around  
43 substance use, and identify gaps in knowledge and policy that would be a catalyst for further  
44 work to enhance knowledge and develop solutions situated within the local context. Thus the  
45 present work presents a timely effort that capitalises on current efforts by the government to  
46 address substance use in the country.

47

## 48 **Introduction**

49

50 Substance use in Africa is on the rise, with projections estimating a 40% increase in  
51 people who use substances between 2018 to 2030 [1]. This represents the largest increase  
52 globally, with Sub-Saharan Africa projected to have the highest increase when compared to  
53 other regions in the world [2]. Moreover, East and West Africa have been identified as key  
54 players in the distribution of drugs. This is concerning, particularly given the expected global  
55 increase in prevalence of substance use disorders (SUDs) due to the economic crisis brought  
56 about by the COVID-19 pandemic [1]. It is thus imperative for African states, as asserted by  
57 the United Nations Office on Drugs and Crime [1] to develop sustainable and human centred  
58 approaches in response to the impending substance use disorder crisis.

59 This renewed call to address substance use disorders comes following the global focus  
60 on mental health and the desire to achieve equitable access to mental health services for  
61 mental, neurological and substance use disorders. This is the key aim of the World Health  
62 Organisation's (WHO) Special Initiative for Mental Health: Universal Health Coverage for  
63 Mental Health, which was launched in 2019 [3]. One of the early adopters of this initiative  
64 from the sub-Saharan Africa region is Zimbabwe, a low to middle income country (LMIC)  
65 that has experienced significant economic, social and political challenges over the past few  
66 decades [4]. In spite of these challenges, the country has shown a commitment towards  
67 strengthening its mental health systems through its National Strategic Plan for Mental Health  
68 Services (2019-2023) [5], which is in synergy with the goals of the WHO Special Initiative.

69 In line with data across the sub-Saharan Africa region, evidence suggests an upward  
70 trend of substance use in the Zimbabwean population. For example, between 2009-2019,  
71 alcohol use was up from 9<sup>th</sup> to 8<sup>th</sup> place, in the top 10 risk factors contributing to disability  
72 adjusted life years (DALYS) in Zimbabwe [6]. Additionally, media reports paint a picture of

73 an escalating and worrying situation of substance use, involving both licit and illicit  
74 substances. Moreover, the situation has been reported to be more complex, economic, and  
75 political, with clear signs of moving beyond teenage experimentation or chosen unhealthy  
76 behaviours [7]. Substances of concern reported on include alcohol (including illicit  
77 ‘moonshine’ brews), methamphetamine (crystal meth locally known as mutoriro), cough  
78 syrups containing codeine, and marijuana [8, 9, 10]. Reports of local youths identified to be  
79 in a drunken like stupor are widespread in the media, and colloquially referred to as ‘ku  
80 sticker’ (in reference to the paralytic like stupor youths high on substances are often found in)  
81 [10].

82 Anecdotal evidence also suggests a rise in substance use fuelled by the COVID-19  
83 pandemic and resultant lockdowns [10, 11], so much so that it has been labelled an  
84 ‘impending public health disaster’ [12]. The ease of availability of substances, together with a  
85 lack of recreational activities for young people during lockdowns have both been cited as  
86 potential reasons for the increase [12]. However, even prior to the pandemic, drug use,  
87 particularly among the youth in Zimbabwe, was already reported to be reaching crisis levels  
88 [13], with concerns around drug use in vulnerable populations such as children living on the  
89 streets [14]. It can be asserted that the significant socio-economic challenges experienced in  
90 the country are most likely linked to the observed substance use issues. Indeed, poverty is  
91 endemic in Zimbabwe, affecting 70% of the population [4], and has been identified as a risk  
92 factor for substance use [15]. Socio economic challenges are also linked to increased rates of  
93 stress, trauma, and mental health challenges which all increase risk for substance use [15].

94 The situation is further compounded by the treatment gap for mental, neurological and  
95 substance use disorders, with sub-Saharan Africa having the largest gap globally [16]. This is  
96 largely linked to the ‘brain drain’ due to mass emigration of mental health professionals [17],  
97 and significant underfunding for mental health services due to resource constraints [3]. For

98 example, there is a paucity of drug and alcohol specialist treatment facilities in Zimbabwe  
99 [3]. The situation for managing SUDs is also likely to be worsened by the emerging reports  
100 of the country becoming a hub for drug trafficking, whereby drug runners are reportedly  
101 compensated for their services using drugs, increasing availability of drugs in local  
102 communities [18, 9].

103 In response to these challenges, the country recently launched the Zimbabwe National  
104 Drug Master Plan (2020-2025) [19] which aims to provide both a comprehensive and  
105 integrated approach to address the rise in substance use in the country. Within this key  
106 strategic document, the government of Zimbabwe reports that currently approximately 60%  
107 of patients admitted in mental health institutions experience substance induced disorders [19].  
108 However, significant challenges are evident in trying to ascertain a reliable picture of the  
109 nature of SUDs in the country, owing to the evolving complexity of the problem and the lack  
110 of a national monitoring system for substance use. Subsequently, most ‘evidence’ cited tends  
111 to be anecdotal in nature, and heavily reliant on secondary sources. Thus, it is imperative to  
112 gain an understanding of the primary evidence and policy landscape in Zimbabwe, in order to  
113 gauge what is known and what is being done about substance use and SUDs. This will also  
114 aid in identifying any gaps in knowledge and assist in development of culturally and locally  
115 appropriate and sustainable solutions to addressing SUDs. With these concerns in mind, the  
116 scoping review aims to develop a broad understanding of the nature of substance use and  
117 SUDs in the Zimbabwean context. The scoping review also seeks to understand interventions  
118 that have been developed and utilised in Zimbabwe, together with an analysis of the  
119 legislative and policy landscape in relation to substance use and SUDs.

120

## 121 **Method**

122 A scoping review is suggested due to the breadth of information required to gain a  
123 broad understanding of the nature of the evidence and policy relating to substance use and  
124 SUDs in Zimbabwe. In developing the protocol, the framework developed by Arksey and  
125 O'Malley [20] together with relevant previous applications of this framework, for example,  
126 [21, 22] were consulted. Ethics approval was waived by the De Montfort University Faculty  
127 of Health and Life Sciences Research Ethics Committee.

## 128 **Stage 1: Research Question**

129 In developing the research question, the 'Population, Concept, Context' (PCC) paradigm  
130 by the Joanne Briggs Institute was utilised [23]. The 'population' is open, inclusive of both  
131 sexes and across a wide range of age groups. The 'concept' under study is substance use and  
132 use disorders, broadly encompassing both licit and illicit substances. The 'context' is  
133 geographically limited to Zimbabwe, as the review will pertain to evidence and literature  
134 from and about Zimbabwe. With these considerations in mind, the identified research  
135 questions are:-

- 136 1. What is the nature of substance use and SUDs in Zimbabwe?
- 137 2. What is the response to substance use and SUDs in Zimbabwe?

## 138 **Research Aim**

139 The overarching aim of the scoping review will be to provide an assessment of the literature  
140 and policy on substance use and SUDs in Zimbabwe.

## 141 **Objectives**

142 The review's aim will be realised through the following objectives:

- 143 1. To identify the substances being used and/or misused within Zimbabwe

- 144 2. To understand patterns, prevalence and consequences of use, and use disorders
- 145 3. To identify and evaluate any interventions and/or harm reduction strategies being  
146 utilised
- 147 4. To identify and critique legislative, policy and strategic documents relevant to  
148 substance use management in Zimbabwe.
- 149 5. To identify gaps in knowledge, policy and strategy, and provide recommendations for  
150 addressing these gaps.

151

## 152 **Stage 2: Identifying Relevant Literature**

153 The scoping review will encompass both primary empirical studies, and policy/strategic/  
154 legislative documents. BM will lead on primary empirical studies and CN will lead on the  
155 policy/strategic/legislative documents. In order to capture both of these sources, two separate  
156 successive search strategies will be employed iteratively, refining the process as necessary as  
157 the study is conducted. Empirical studies will be identified first, followed by legislative,  
158 policy and strategic documents.

## 159 **Identifying Relevant Studies**

160 The databases to be used were identified by 2 authors (BM & CN), with the help of a  
161 subject librarian. The databases to be used for identifying primary empirical studies will be  
162 Medline (PubMed), Scopus, Academic Search Premier, the Cumulative Index to Nursing and  
163 Allied Health Literature (CINAHL Plus), Africa-Wide Information, Web of Science,  
164 PsychInfo, and PsycArticles. Grey literature sources will also be utilised in order to capture  
165 data from unpublished sources. For example, Web of Science Conference Proceedings; Grey  
166 Literature Report, and Open Grey.

167 In order to be included in the review, the identified studies must meet the following inclusion  
168 criteria: -

- 169 • Studies should have been published in the last 10 years (2012- 2022) in order to  
170 provide a contemporary perspective on the situation and to capture the influences of  
171 the economic & political changes post the Global Political Agreement signed between  
172 the country's two main political parties at the time [24, 25].
- 173 • Both peer reviewed studies and grey literature will be eligible in order to  
174 comprehensively capture relevant information.
- 175 • Studies should be empirical studies in order to capture primary data sources
- 176 • Studies should be located in Zimbabwe and/or reporting on the Zimbabwean situation  
177 (in order to capture studies done outside but about Zimbabwe)
- 178 • Quantitative, qualitative and mixed methodology will be included in order to  
179 represent both the nomothetic and idiographic perspectives on substance use.

180 In order to focus the review, the following exclusion criteria will be employed to exclude  
181 studies

- 182 • Studies written in languages other than English or without available English  
183 translations will be excluded.
- 184 • Animal studies will also be excluded.

185

## 186 **Search Strategy**

187 Search terms were developed iteratively, and refined after running a sample web based search  
188 with broad terms for substances (substance OR drug AND Zimbabwe). Specific substances  
189 were identified from the sample search results and from the Zimbabwe National Drug  
190 Masterplan (2020-2025) [19], a key policy document developed for addressing substance use



191 issues in Zimbabwe. This enabled the identification of substances and the associated  
192 terminology specific to the local context. See Table 1 for list of search terms.

193 **Table 1. Search terms**

| <i>Keyword</i> | <i>Alternatives</i>                                                                                                                                                                                                                                              |
|----------------|------------------------------------------------------------------------------------------------------------------------------------------------------------------------------------------------------------------------------------------------------------------|
| Substance      | Drug OR Alcohol OR <sup>1</sup> Musombodia OR <sup>1</sup> Kachasu OR Cannabis OR Marijuana OR <sup>2</sup> Mbanje OR Methamphetamine OR Crystal Meth OR <sup>3</sup> Mutoriro OR Cough Syrup OR <sup>4</sup> Broncleer OR Codeine OR Opioid OR Opiate OR Heroin |
| Disorder       | Use OR Abuse OR Misuse OR Addiction                                                                                                                                                                                                                              |
| Intervention   | Therapy OR Treatment OR Harm Reduction OR Rehabilitation                                                                                                                                                                                                         |
| Zimbabwe       | Harare OR Bulawayo                                                                                                                                                                                                                                               |

194 Boolean operators (AND/ OR) will be used to combine search terms, together with  
195 truncations for capturing term variations (e.g. Addict\*) as appropriate for each database.

196 <sup>1</sup>Shona colloquialisms for local moonshine alcohol brews. <sup>2</sup>Shona term for cannabis. <sup>3</sup>Shona  
197 term for crystal meth. <sup>4</sup> Illegally imported and banned brand of cough syrup containing  
198 codeine used locally.

199 **Identifying Relevant Legislative, Policy and Strategic Documents**

200 Legislative documents will be identified initially from searches conducted within the  
201 Zimbabwe Legal Institute Database. References to relevant legislative, policy and strategic  
202 documents will also be followed from the empirical studies identified in the initial search.  
203 Web searches, using the Google search engine, will be conducted to find additional  
204 documents. In order to be included in the review, the documents identified must meet the  
205 following inclusion criteria: -

- 206 • The documents should have a specific substance use and/or SUD focus
- 207 • The documents should be publicly available
- 208 • Primary source outlining policy/strategy or legislation in Zimbabwe

209

210 Documents that provide a commentary on or review of substance use policy, strategy, or  
211 legislation will be excluded. This should allow us to capture the policy landscape surrounding  
212 substance use in the country, and not others' assertions on this.

## 213 **Stage 3: Study and Document Selection**

### 214 **Study Selection**

215 In order to select studies for inclusion in the review, multiple researchers will be  
216 employed for bias reduction. This will be carried out in different stages as follows:

- 217 1. Article titles will be reviewed in order to identify those with a key focus on substance  
218 use or SUDs. Where suitability of article is not clear it will be retained and reviewed  
219 at second stage (Research Assistant [RA] supervised by BM)
- 220 2. Review of abstracts and titles using inclusion and exclusion criteria will be conducted  
221 by 2 simultaneous independent reviewers (BM & RA). Cohen's K for inter-rater  
222 agreement will be calculated on the inclusion/exclusion decisions. If there is  
223 discordance between reviews, this will be resolved by a third reviewer (AW)
- 224 3. Review of full text against inclusion and exclusion criteria will be conducted by 2  
225 simultaneous independent reviewers (BM & CN). Cohen's K for inter-rater agreement  
226 will be calculated for the inclusion/exclusion decisions. If there is discordance  
227 between reviewers, this will be resolved by a third reviewer (SM).

228

### 229 **Legislative/Policy/Strategic Document Selection**

230 In order to select legislative, policy and strategic documents for inclusion, full text  
231 documents will be reviewed against the inclusion criteria by 2 simultaneous independent  
232 reviewers (CN & BM). If there is discordance between reviewers, this will be resolved by  
233 a third reviewer (SM).

234 **Stage 4: Charting the data**

235 The RA will extract and chart the bibliometric information and study characteristics  
 236 (under supervision by BM) based on the following pre-created data extraction framework  
 237 shown in Table 2.

238 **Table 2. Data Extraction Framework**

| <b>Bibliometric information</b>                   | <b>Characteristics of the study</b>                                                                                                                                                                                                       | <b>Categories of study characteristics</b>                                                              |
|---------------------------------------------------|-------------------------------------------------------------------------------------------------------------------------------------------------------------------------------------------------------------------------------------------|---------------------------------------------------------------------------------------------------------|
| Title                                             | Research question/aim(s)                                                                                                                                                                                                                  | Definitions and conceptualisations of key concepts and associated terms: substance use and use disorder |
| Authors                                           | Study Design                                                                                                                                                                                                                              | Patterns of use and use disorder                                                                        |
| Source                                            | Sample (e.g. n =, age, geographical location [rural/urban], co-morbidity, socio-economic status/ occupation)                                                                                                                              |                                                                                                         |
| Publication Year                                  | Type(s) of substance(s) studied                                                                                                                                                                                                           | Harms associated with substance use/ use disorder                                                       |
| Profession of primary author/ academic discipline | Substance use measure utilised                                                                                                                                                                                                            | Treatment Approaches                                                                                    |
|                                                   | Terms/definitions/conceptualisations of substance use and use disorder<br>Prevalence of substance use/use disorder<br>Quantity/Amount of substance use<br>Factors influencing substance use<br>Consequences of substance use/use disorder | Summary of key message(s)                                                                               |
|                                                   | Intervention type(s) & delivery team                                                                                                                                                                                                      | Areas for further development                                                                           |
|                                                   | Intervention Outcome(s)<br>Key recommendation(s)                                                                                                                                                                                          |                                                                                                         |

239  
 240 Two researchers (CN & SM) will extract information from the legislative/policy/strategic  
 241 documents and chart it based on the following purpose made policy checklist (Table 3). This  
 242 checklist is an adaptation of a mental health systems policy checklist created by the  
 243 EMBASE research consortium for LMICs, and previously applied to the Zimbabwean

244 context [26]. Substance use specific information was also extracted from a policy checklist  
 245 created by the AIDS and Rights Alliance for Southern Africa [27] and integrated within the  
 246 current checklist.

247 **Table 3. Policy & Strategic Document Checklist**

| <b>Bibliometric Information</b>                          | <b>Document Characteristics</b>                        | <b>Categories of document characteristics</b> |
|----------------------------------------------------------|--------------------------------------------------------|-----------------------------------------------|
| Author                                                   | Consultation with service users and caregivers         | Service Provision                             |
| Date                                                     | Promotes cultural approach                             | Human Rights                                  |
| Enacted                                                  | De-criminalisation of drug possession                  |                                               |
| Description                                              | Specific provisions in legislation (i.e. legalisation) | Special/vulnerable populations                |
|                                                          | PWID identified as key populations for HIV prevention  |                                               |
|                                                          | Harm Reduction (e.g. needle and syringe programmes)    | Knowledge Management                          |
|                                                          | Specialist Drug Rehabilitation                         |                                               |
|                                                          | Community Care                                         | Interventions                                 |
|                                                          | Evidence-based practice                                |                                               |
|                                                          | Intersectoral collaboration                            |                                               |
|                                                          | Finance and Funding                                    |                                               |
|                                                          | Prevention                                             |                                               |
|                                                          | Advocacy                                               |                                               |
| National Monitoring System                               |                                                        |                                               |
| Young people (children, adolescents, youth)              |                                                        |                                               |
| Trauma informed care                                     |                                                        |                                               |
| Underserved and marginalised populations (e.g. homeless) |                                                        |                                               |
| MH Comorbidity                                           |                                                        |                                               |

248

249 **Stage 5: Collating, summarising and reporting the results**

250 The RA will conduct a numerical analysis of bibliometric data and produce a PRISMA  
 251 flow diagram for the scoping review process. A combined inductive-deductive thematic  
 252 analysis of study characteristics and categories will initially be conducted by two researchers  
 253 (BM &AW). This will then be reviewed and refined by the rest of the team (CN & SM). The  
 254 findings will be summarised and written up in the final report by two researchers initially  
 255 (BM &AW), with final revisions by the rest of the team (CN and SM). The Preferred

256 Reporting Items for Systematic reviews and Meta-Analyses extension for Scoping Reviews  
257 (PRISMA-ScR) checklist will be utilised for writing up the scoping review [28].

258 For the legislative, policy and strategic documents, a combined inductive-deductive  
259 thematic analysis of study characteristics and categories will initially be conducted by two  
260 researchers (CN and SM). This will then be reviewed and refined by the rest of the team (BM  
261 & AW). The findings will be summarised and written up in the final report by two  
262 researchers initially (CN & SM), with final revisions by the rest of the team (BM & AW).

263

## 264 **Summary**

265 The results of the scoping review will be essential for identifying the current state of  
266 knowledge around substance use, and identify gaps in knowledge and policy that would be a  
267 catalyst for further work to enhance knowledge and develop solutions situated within the  
268 local context. Thus the present work presents a timely effort that capitalises on current efforts  
269 by the government to address substance use in the country.

270

## 271 **References**

- 272 1. United Nations Office on Drugs and Crime. World drug report [Internet]. 2021 [cited  
273 11 May 2022]. Available from:  
274 [https://www.unodc.org/res/wdr2021/field/WDR21\\_Booklet\\_1.pdf](https://www.unodc.org/res/wdr2021/field/WDR21_Booklet_1.pdf)
- 275 2. Donnenfeld Z, Bello-Schünemann J, Wellborn L. Drug Demand and Use in Africa  
276 Modelling Trends to 2050. Pan-African Programme ENACT: Enhancing Africa's  
277 capacity to respond more effectively to transnational organised crime. [Internet]. 2019  
278 [cited 11 May 2022]. Available from: [https://enact-  
279 africa.s3.amazonaws.com/site/uploads/2019-08-28-drug-demand-and-use-in-africa-  
280 reaseach-paper-cb.pdf](https://enact-africa.s3.amazonaws.com/site/uploads/2019-08-28-drug-demand-and-use-in-africa-reaseach-paper-cb.pdf)
- 281 3. Kemp CG, Concepcion T, Ahmed HU, Anwar N, Baingana F, Bennett IM, Bruni A,  
282 Chisholm D, Dawani H, Erazo M, Hossain SW. Baseline situational analysis in  
283 Bangladesh, Jordan, Paraguay, the Philippines, Ukraine, and Zimbabwe for the WHO  
284 Special Initiative for Mental Health: Universal Health Coverage for Mental Health.  
285 Plos one. 2022 Mar 22;17(3):e0265570.

- 286 4. World Health Organisation. WHO Special Initiative for Mental Health. Situational  
287 Assessment. [Internet]. 2020 [cited 1 June 2022]. Available from:  
288 [https://www.who.int/publications/m/item/zimbabwe---who-special-initiative-for-](https://www.who.int/publications/m/item/zimbabwe---who-special-initiative-for-mental-health)  
289 [mental-health](https://www.who.int/publications/m/item/zimbabwe---who-special-initiative-for-mental-health)  
290
- 291 5. Ministry of Health and Child Care, Zimbabwe. National Strategic Plan for Mental  
292 Health Services 2019 – 2023 [Internet]. 2019 [cited 11 June 2022]. Available from:  
293 <https://www.mindbank.info/item/6829>  
294
- 295 6. Institute for Health Metrics and Evaluation (IHME). Zimbabwe profile. Seattle, WA:  
296 IHME, University of Washington [Internet] 2021. [cited May 31 2022]. Available  
297 from <http://www.healthdata.org/Zimbabwe>.  
298
- 299 7. Nhunzvi C. Substance abuse: Beyond peer pressure, and experimentation. The Herald.  
300 24 October 2019. [cited July 6 2022]. Available from  
301 <https://www.herald.co.zw/substance-abuse-beyond-peer-pressure-experimentation/>  
302
- 303 8. Chingono N. 'It'll kill me': Zimbabwe counts cost of rise in illicit alcohol use. The  
304 Guardian 27 September 2021 [cited May 12 2022]. Available from  
305 [https://www.theguardian.com/global-development/2021/sep/27/itll-kill-me-](https://www.theguardian.com/global-development/2021/sep/27/itll-kill-me-zimbabwe-counts-cost-of-rise-in-illicit-alcohol-use)  
306 [zimbabwe-counts-cost-of-rise-in-illicit-alcohol-use](https://www.theguardian.com/global-development/2021/sep/27/itll-kill-me-zimbabwe-counts-cost-of-rise-in-illicit-alcohol-use)  
307
- 308 9. Zivira T. Audio: Inside Harare's dark illegal drug trafficking syndicates. The  
309 Standard 29 February 2016 [cited May 12 2022] Available from  
310 [https://www.thestandard.co.zw/2016/02/29/audio-inside-harares-dark-illegal-drug-](https://www.thestandard.co.zw/2016/02/29/audio-inside-harares-dark-illegal-drug-trafficking-syndicates/)  
311 [trafficking-syndicates/](https://www.thestandard.co.zw/2016/02/29/audio-inside-harares-dark-illegal-drug-trafficking-syndicates/)  
312
- 313 10. Factsheet – Zimbabwe's drug, alcohol abuse problem under COVID-19. ZIMFACT.  
314 10 August 2021 [cited May 11 2022] Available from [https://zimfact.org/factsheet-](https://zimfact.org/factsheet-zimbabwes-drug-alcohol-abuse-problem-under-covid-19/)  
315 [zimbabwes-drug-alcohol-abuse-problem-under-covid-19/](https://zimfact.org/factsheet-zimbabwes-drug-alcohol-abuse-problem-under-covid-19/)  
316
- 317 11. Chingono N. 'We forget our troubles': crystal meth use rises during lockdown in  
318 Zimbabwe. The Guardian 16 March 2021 [cited May 12 2022] from  
319 [https://www.theguardian.com/global-development/2021/mar/16/crystal-meth-](https://www.theguardian.com/global-development/2021/mar/16/crystal-meth-mutoriro-drug-use-rises-zimbabwe-lockdown)  
320 [mutoriro-drug-use-rises-zimbabwe-lockdown](https://www.theguardian.com/global-development/2021/mar/16/crystal-meth-mutoriro-drug-use-rises-zimbabwe-lockdown)  
321
- 322 12. Mukwenha S, Murewanhema G, Madziva R, Dzinamarira T, Herrera H, Musuka G.  
323 Increased illicit substance use among Zimbabwean adolescents and youths during the  
324 COVID-19 ERA: An Impending Public Health Disaster. *Addiction*.  
325 2021;117(4):1177–8. <https://doi.org/10.1111/add.15729>  
326
- 327 13. Maraire T, Devi Mariamdarani Chethiyar S, Alif Bin Jasni M. A general review of  
328 Zimbabwe's response to drug and substance abuse among the youth. people:  
329 *International Journal of Social Sciences*. 2020;6(2):625-638.  
330
- 331 14. Mhizha S. The self image of adolescent street children in Harare. [MPhil]. University  
332 of Zimbabwe; 2010.  
333 [https://ir.uz.ac.zw/jspui/bitstream/10646/996/1/MHIZHA\\_THESIS.pdf](https://ir.uz.ac.zw/jspui/bitstream/10646/996/1/MHIZHA_THESIS.pdf)  
334
- 335 15. **United Nations Office on Drugs and Crime (UNODC)** (2018). World Drug Report.  
336 Accessed June 15, 2022 from <https://www.unodc.org/wdr2018/>  
337
- 338 16. Maraire T, Devi Mariamdarani Chethiyar S, Alif Bin Jasni M. A general review of  
339 Zimbabwe's response to drug and substance abuse among the youth. people:  
340 *International Journal of Social Sciences*. 2020;6(2):625-638.  
341
- 342 17. Chibanda D. Reducing the treatment gap for mental, neurological and substance use  
343 disorders in Africa: lessons from the Friendship Bench in Zimbabwe. *Epidemiology*  
344 and *Psychiatric Sciences*. 2017;26(4):342-347.
- 345 18. Global Drug Policy Observatory. Country Snapshot: Drugs in Zimbabwe. [Internet]  
2014 [cited June 15 2022] Available from <https://gdpo.swan.ac.uk/?p=245>

- 335 19. Zimbabwe National Drug Masterplan (2020-2025). [Internet] 2020. [cited May 16  
336 2022] from [https://www.ltaz.co.zw/wp-content/uploads/2021/06/Zimbabwe-National-](https://www.ltaz.co.zw/wp-content/uploads/2021/06/Zimbabwe-National-Drug-Master-Plan-7-5.pdf)  
337 [Drug-Master-Plan-7-5.pdf](https://www.ltaz.co.zw/wp-content/uploads/2021/06/Zimbabwe-National-Drug-Master-Plan-7-5.pdf)
- 338 20. Arksey H, O'Malley L. Scoping studies: towards a methodological framework.  
339 International Journal of Social Research Methodology. 2005;8(1):19-32.
- 340 21. Sinclair DL, Sussman S, Savahl S, Florence M, Adams S, Vanderplasschen W.  
341 Substitute addictions in persons with substance use disorders: A scoping review.  
342 Substance use & misuse. 2021 Feb 19;56(5):683-96.
- 343 22. Nhunzvi C, Langhaug L, Mavindidze E, Harding R, Galvaan R. Occupational justice  
344 and social inclusion among people living with HIV and people with mental illness: a  
345 scoping review. BMJ Open. 2020;10(8):e036916.
- 346 23. The Joanna Briggs Institute (2015) Methodology for JBI scoping reviews. Accessed  
347 April 5 2022 from [https://nursing.lsuhscc.edu/JBI/docs/ReviewersManuals/Scoping-](https://nursing.lsuhscc.edu/JBI/docs/ReviewersManuals/Scoping-.pdf)  
348 [.pdf](https://nursing.lsuhscc.edu/JBI/docs/ReviewersManuals/Scoping-.pdf)
- 349 24. Government of Zimbabwe. Government Political Agreement. 2008 Harare: Printflow
- 350 25. Raftopoulos, B. The global political agreement as a 'passive revolution': Notes on  
351 contemporary politics in Zimbabwe. In Chan S, Primorac R. Zimbabwe Since The  
352 Unity Government, 1<sup>st</sup> ed. Abingdon (GB) Routledge, 2013. p. 113-126.
- 353 26. Kidia K, Machando D, Mangezi W, Hendler R, Crooks M, Abas M et al. Mental  
354 health in Zimbabwe: a health systems analysis. The Lancet Psychiatry.  
355 2017;4(11):876-886.
- 356 27. AIDS and Rights Alliance for Southern Africa (ARASA). 'Don't Treat Us as  
357 Outsiders'. Drug Policy and the Lived Experiences of People Who Use Drugs in  
358 Southern Africa. [Internet] 2019 [cited June 15 2022]. Available from  
359 <http://fileservr.idpc.net/library/don-ttreatusasoutsidersfinal.pdf>
- 360 28. Tricco AC, Lillie E, Zarin W, O'Brien KK, Colquhoun H, Levac D, et al. PRISMA  
361 Extension for Scoping Reviews (PRISMA ScR): Checklist and Explanation. Ann  
362 Intern Med. 2018;169:467-473. doi: 10.7326/M18-0850.

363

364

365
